# Supplementary material for: New Macroseismic and Morphotectonic Constraints to Infer a Fault Model for the 9 (Mw6.1) and 11 January (Mw7.3) 1693 Earthquakes (Southeastern Sicily)
Source: Frontiers journal article supplement (doi:10.3389/feart.2020.550851), 2020-11-20
Supplement: Data_Sheet_1.PDF [file Data_Sheet_1.PDF]

## Supplementary material

**Table S1.** Geometry and kinematics, in the literature, of the sources of the 9 and 11 January 1693 earthquakes.

| Earthquake | acronym           | Associated Fault                     | Mw      | Azimuth | Prevailing kinematics | Fault length (km) | Fault width (km) | References                                                                    |
|------------|-------------------|--------------------------------------|---------|---------|-----------------------|-------------------|------------------|-------------------------------------------------------------------------------|
| 09/1/1693  | MEFS              | Malta Escarpment Fault System        | 6.1     | 170     | Normal                | 12.9              | 8.2              | Azzaro and Barbano (2000)                                                     |
| 11/1/1693  | MEFS              | Malta Escarpment Fault System        | 6.8     | 170     | Normal                | 37                | 14.6             | Azzaro and Barbano (2000)                                                     |
| 11/1/1693  | MEFS              | Malta Escarpment Fault System        | 7.1     | 170     | Normal                | 54.1              | 17.9             | Piatanesi and Tinti (1998); Jacques et al. (2001); Argnani and Bonazzi (2005) |
| 09/1/1693  | AF                | Avola fault                          | 6.1     | 230     | Normal                | 13                |                  | Bianca et al. (1999)                                                          |
| 09/1/1693  | MLF               | Monte Lauro Fault                    | 6.6     | 57      | Thrust                | 24                | 11.9             | DISS Working Group (2018)                                                     |
| 11/1/1693  | GF                | Gravina di Catania                   | 6.0     | 246     | Thrust                | 9                 | 5.9              | DISS Working Group (2018)                                                     |
| 11/1/1693  | SLGF 1 and SLGF 2 | Faults of the Scordia-Lentini Graben | 7.1     | 70      | Normal                | 54.1              | 17.9             | D'Addezio and Valensise (1991)                                                |
| 11/1/1693  | SRFS              | Scicli Ragusa Fault System           | 7.4     | 11      | Strike                | 81                | 22.3             | Sirovich and Pettenati (2001); DISS Working Group (2018)                      |
| 11/1/1693  | SP                | Subduction plane                     | 8.0     | 230     | Thrust                | 120               | 160              | Gutscher et al. (2006)                                                        |
| 11/1/1693  | SBT               | Sicilian Basal Thrust                | 6.8-7.1 | 270     | Thrust                | 27-63             | 15-27            | Lavecchia et al. (2007); DISS Working Group (2018)                            |
| 11/1/1693  | STEP              | STEP fault system                    | 7.4     | 290     | transtensive          | 130               |                  | Polonia et al. (2012)                                                         |

**Table S2.** Reports of environmental effects that could be related with coseismic faulting.

| Description                                                                                                                                                                                                                                                                                                                                                                                                                                                                                                                                                                                                                                                                                                                                                                                                                                                                                                                                                                          | Source         |
|--------------------------------------------------------------------------------------------------------------------------------------------------------------------------------------------------------------------------------------------------------------------------------------------------------------------------------------------------------------------------------------------------------------------------------------------------------------------------------------------------------------------------------------------------------------------------------------------------------------------------------------------------------------------------------------------------------------------------------------------------------------------------------------------------------------------------------------------------------------------------------------------------------------------------------------------------------------------------------------|----------------|
| <p>“[...] <i>Un campo o pezzo di terra avvallò pari pari, otto palmi d'altezza sotto il livello del terreno adiacente...Nel territorio di Sortino in una tenuta di Terre lunga un mezzo miglio, e assai meno larga si vede interpellatamente a poca distanza, affondata la Terra, e abbassata dalla parte dello stretto a lunghissime strisce, dove due, dove tre, e dove più palmi, e all'ultima parte finisce con una Voragine circolare assai profonda</i>”</p> <p>[A piece of land was completely lowered, eight palms of height below the level of the adjacent land ... In the territory of Sortino in an estate half a mile long, and much less wide the land is clearly lowered with very long stripes as far as a very deep circular chasm]</p>                                                                                                                                                                                                                             | Boccone (1697) |
| <p>“<i>Nella via regia che, da Lentini conduce a Catania, una volta avvenuta la scossa, una grande voragine, apertasi al suolo, inghiottì nelle profonde fauci alcuni mulattieri e anche le mule. In particolare, in quel rione a cui diedero il nome i Siculi (Bottedaceto = Buttaceto), la terra si aprì in modo spropositato, della quale fenditura la larghezza misurava otto palmi, la lunghezza 25 passi e la profondità fu tale che alcuni contadini vi gettarono dei sassi, ma udirono un cupo strepito soltanto dopo lungo tempo</i>”</p> <p>In the royal road connecting Lentini to Catania, after the shock, a great chasm appeared in the ground that swallowed some muleteers and mules in the deep jaws. In particular, in that district named by the Siculi (Bottedaceto = Buttaceto), the land incredibly opened, with a width of eight palms, a length 25 steps and it was so deep that some peasants threw stones hearing a dull noise only after a long time.</p> | Bottone (1718) |
| <p>“[...] <i>Per un terremoto seguito a Ianicatti (Canicattini) [...] a 28 aprile 1693, mezza salmata di terreno (1 salma = 17.415,37 m²), con certa quantità di capre, e suo pastore sprofondarono, lasciano una voragine tanto alta, che a buttarvi sassi non si udiva il rumore di loro caduta</i>”</p> <p>For an earthquake occurred at Ianicatti (Canicattini) [...] on the 28 April 1693, half a <i>salma</i> of soil (1 <i>salma</i> = 17.415.37 m²), hosting a certain quantity of goats, and his shepherd, sank, leaving a chasm so high, that no sound was heard after throwing stones inside.</p>                                                                                                                                                                                                                                                                                                                                                                         | Boccone (1697) |
| <p>“<i>Vediamo la terra abbassarsi, come se fosse sradicata dal cardine, i monti posti davanti alla città di Paternò, che in ogni tempo impedirono la vista del mare di Catania, ora, dal momento che sprofondarono nella parte orientale, permisero la vista del mare dalla zona della città vecchia</i>”</p> <p>We see the land lowering, as if it was deeply uprooted, the mountains standing in front of the city of Paternò, which used to hide the sight of Catania sea, now, since they sank in the eastern part, they allow the view of the sea from the old city</p>                                                                                                                                                                                                                                                                                                                                                                                                        | Bottone (1718) |

**Table S3. Hierarchical parameters (modified after Pirrotta et al., 2016)**

| Parameters                         | Description                                                                                                     | Abbreviation                                                                                                                                                                                                                                                                                                                                                                                                                                                                             | Assumed values                                                                                                                                                                             | References                                       |
|------------------------------------|-----------------------------------------------------------------------------------------------------------------|------------------------------------------------------------------------------------------------------------------------------------------------------------------------------------------------------------------------------------------------------------------------------------------------------------------------------------------------------------------------------------------------------------------------------------------------------------------------------------------|--------------------------------------------------------------------------------------------------------------------------------------------------------------------------------------------|--------------------------------------------------|
| <b>Strahler order</b>              | indicates the phase of maturity of the hydrographic network                                                     | The fluvial drainage is subdivided in several segments going from a flow junction to the successive one. An order, indicated by a roman number, is associated to each segment of the hydrographic network. The headwater tributaries have the first (I) order. Then, when two segments of the same order meet, the successive fluvial segment gains a major order than the previous. Thus, two I order channels produce a II order segment; two II orders provide a III order, and so on | Hierarchical number is the highest order of the stream network                                                                                                                             | Horton, 1945; Strahler, 1952                     |
| <b>Bifurcation ratio</b>           | They describe the degree of branching of the hydrographic network and highlight possible hierarchical anomalies | $R_{b(u-u+1)} = N_u / N_{u+1}$<br>where $N_u$ is the number of fluvial segments of a given order; $N_{u+1}$ is the number of fluvial segments of the immediately higher order                                                                                                                                                                                                                                                                                                            | It considers how many segments of a given order there are, with respect to the highest order                                                                                               | Horton, 1945; Strahler, 1952; Avena et al., 1967 |
| <b>Direct bifurcation ratio</b>    |                                                                                                                 | $R_{bd} = N_{du} / N_{u+1}$<br>where $N_{du}$ represents the number of fluvial segments of a given order that flow in segments of the next, higher order; $N_{u+1}$ is the number of segments of the next higher order                                                                                                                                                                                                                                                                   | It considers how many segments of a given order flow into the highest order                                                                                                                |                                                  |
| <b>Bifurcation index (R)</b>       |                                                                                                                 | $R = R_b - R_{bd}$<br>$R_b$ encompasses all the segments of a given order, including also the anomalous drainage, while $R_{bd}$ considers only the not anomalous segments.                                                                                                                                                                                                                                                                                                              | For a well-organized basin, ( $R_b \approx R_{bd}$ ) R must approach to zero; on the contrary, high values of R indicate that the fluvial network has not a good hierarchical organization |                                                  |
| <b>Anomaly parameter</b>           | It indicates the fluvial anomalies                                                                              | <b>An</b>                                                                                                                                                                                                                                                                                                                                                                                                                                                                                | i.e. a river segment of a given order u flowing into a segment of order u+2. It is calculated for each u order                                                                             | Avena et al., 1967                               |
| <b>Hierarchical anomaly number</b> | It indicates the fluvial anomalies                                                                              | <b>H<sub>a</sub></b> is the minimum number of first-order segments occurring to disallow hierarchical anomaly                                                                                                                                                                                                                                                                                                                                                                            | High values indicate significant hierarchical anomalies                                                                                                                                    | Avena et al., 1967                               |
| <b>Hierarchical anomaly index</b>  | It allows a better quantification of drainage anomalies                                                         | $\Delta_a = H_a / N_1$<br>where $H_a$ is the number of the hierarchical anomaly and $N_1$ is the number of first-order segments of the network                                                                                                                                                                                                                                                                                                                                           | values approaching to 0 indicate a good hierarchical organization of the basin, while values approaching to or over 1 show a low degree of hierarchical organization                       |                                                  |

**Table S4. Geomorphic indexes (modified after Pirrotta et al., 2016)**

| Geomorphic indexes      | description                                                                                                                       | Abbreviation                                                                                                                                       | Assumed values                                                                                                                    | Reference                                                           |
|-------------------------|-----------------------------------------------------------------------------------------------------------------------------------|----------------------------------------------------------------------------------------------------------------------------------------------------|-----------------------------------------------------------------------------------------------------------------------------------|---------------------------------------------------------------------|
| <b>Asymmetry factor</b> | allows evaluating the asymmetry of the basin that can be due to broad lateral tilting or uplift and subsidence of discrete blocks | <b>AF= 100(Ar/At)</b><br>Where <b>Ar</b> is the area of the basin on the hydrographic right, with respect to the main stream segment; <b>At</b> is | AF value greater than 50 indicates shifting towards hydrographic left whereas a value lower than 50 indicates rightwards shifting | Hare and Gardner, 1985; Cox, 1994; Pinter, 2005; Molin et al., 2004 |

|                                               |                                                                                                                                                                                                                                                                                               |                                                                                                                                                                                                                                                                                                                                                                                                                      |                                                                                                                                                                                                                                                                                                                                                                                                                                                                                                                                                                                                                       |                                                                    |
|-----------------------------------------------|-----------------------------------------------------------------------------------------------------------------------------------------------------------------------------------------------------------------------------------------------------------------------------------------------|----------------------------------------------------------------------------------------------------------------------------------------------------------------------------------------------------------------------------------------------------------------------------------------------------------------------------------------------------------------------------------------------------------------------|-----------------------------------------------------------------------------------------------------------------------------------------------------------------------------------------------------------------------------------------------------------------------------------------------------------------------------------------------------------------------------------------------------------------------------------------------------------------------------------------------------------------------------------------------------------------------------------------------------------------------|--------------------------------------------------------------------|
|                                               |                                                                                                                                                                                                                                                                                               | the area of the entire drainage basin                                                                                                                                                                                                                                                                                                                                                                                |                                                                                                                                                                                                                                                                                                                                                                                                                                                                                                                                                                                                                       |                                                                    |
| <b>Transverse Topographic Symmetry factor</b> |                                                                                                                                                                                                                                                                                               | <b>T = Da/Dd</b><br>where <b>Da</b> is the distance from the trunk stream to the basin midline; <b>Dd</b> is the distance from the basin watershed to the basin midline                                                                                                                                                                                                                                              | The basin must be divided into constant intervals. Stability is indicated by low <b>T</b> values ( <b>Da</b> approaches to zero); on the contrary, <b>T</b> values approaching to 1 indicate basin asymmetry and thus tilting                                                                                                                                                                                                                                                                                                                                                                                         | Cox, 1994                                                          |
| <b>Basin elongation Ratio (Re)</b>            | describes the planimetric shape of the basin and its phase of maturity; a mature basin, draining on a stable area, has a shape similar to a circle, whereas a basin draining on an area that is suffering fast uplift shows elongated narrow shape                                            | The shape is quantified as:<br><b>Re = (2√A:√Π)/Lb</b><br>Where <b>A</b> is the basin area, <b>Lb</b> the length of the basin parallel to the principal drainage line.                                                                                                                                                                                                                                               | The basin area is considered as a circle and its hypothetical diameter is compared to the basin length. High values indicate a shape approaching to a circle; on the contrary, low values indicate elongated basins whose shape depends on the tectonic control                                                                                                                                                                                                                                                                                                                                                       | Bull and McFadden, 1977; Molin et al., 2004                        |
| <b>Hypsometric integral</b>                   | quantifies the areal distribution of the elevation of the relief in the basin, describing the stage of the drainage basin or part of it, if youthful, mature or old. This parameter highlights possible local or more widely areal rejuvenation, due to regional uplift or fault dip movement | Hypsometric integral is measured for interval of elevation. The relative area ( <b>a/A</b> ratio, with <b>A</b> total area and <b>a</b> the area of the basin above a give elevation <b>h</b> , and the relative elevation ( <b>h/H</b> ratio, with <b>H</b> maximum basin elevation and <b>h</b> topographic elevation), are represented in the Cartesian graph                                                     | The curve shape indicates the evolution stage of the basin: an upward convex curve indicates a juvenile stage, a sigmoidal curve a mature stage, finally an upward concave curve a senile stage                                                                                                                                                                                                                                                                                                                                                                                                                       | Strahler, 1952                                                     |
| <b>Stream length-gradient index (SL)</b>      | It is sensitive to change in channel slope and allows evaluating relationships among possible tectonic activity, rock resistance and topography. It is very sensitive to lithology, values must be punctually related to lithology cropping out                                               | <b>SL = (DH/ DL) L</b><br>The trunk channel is divided into segments with constant increasing of elevation, <b>DH</b> ; for each tract is measured the length <b>DL</b> and <b>L</b> that is the channel length from the midpoint of the reach upstream. The value of <b>SL</b> index is referred to the midpoint                                                                                                    | Tectonic uplift will be expressed by high <b>SL</b> values. Anomalous high <b>SL</b> values not ascribable to lithological changes can represent punctual action of dip slip faults                                                                                                                                                                                                                                                                                                                                                                                                                                   | Merritts and Vincent, 1989; Hack, 1973; Burbank and Anderson, 2001 |
| <b>Valley width-height ratio (Vf)</b>         |                                                                                                                                                                                                                                                                                               | <b>Vf = 2Vfw/[(Eld-Esc)+(Erd-Esc)]</b><br><br>Where <b>Vfw</b> is the width of the valley floor, <b>Eld</b> and <b>Erd</b> the elevations of the left and right valley watershed, respectively and <b>Esc</b> the elevation of the valley floor. A number of established valley profiles are obtained for fixed constant distance intervals; for each one, the width and elevations of valley and floor are measured | This index describes the maturity of the valley differentiating between broad-floored canyons, with relatively high values of <b>Vf</b> , and V-shape valleys, with relatively low values. Thus, high <b>Vf</b> values are associated with stability of the area where the drainage flows; on the contrary, low values express incised valleys generally associated to high regional uplift rate or local uplift due to active faults. Local uplift due to faults can be expressed by local variation of the <b>Vf</b> index that can change from relatively high values to low values for a given reach of the basin | Bull, 1977; Ouchi, 1985                                            |

**Table S5. Values of geomorphic indexes, calculated from the mouth to the headwater of the basin; SL index is calculated for elevation range of 50 m.**

|                      | AF    | Re   | T    | Vf                         | SL      |
|----------------------|-------|------|------|----------------------------|---------|
| <b>Mulinello R.</b>  | 50.11 | 0.39 | 0.49 | V <sub>max</sub> 56.37     | 109.91  |
|                      |       |      | 0.45 | V <sub>min</sub> 1.48      | 104.09  |
|                      |       |      | 0.30 | V <sub>average</sub> 12.69 | 204.96  |
|                      |       |      | 0.03 |                            | 125.46  |
|                      |       |      | 0.53 |                            | 109.25  |
|                      |       |      | 0.74 |                            | 25.00   |
|                      |       |      | 0.51 |                            |         |
|                      |       |      | 0.43 |                            |         |
|                      |       |      | 0.20 |                            |         |
|                      |       |      | 0.29 |                            |         |
|                      |       |      |      |                            |         |
| <b>Marcellino R.</b> | 77.11 | 0.40 | 0.10 | V <sub>max</sub> 14.19     | 306.05  |
|                      |       |      | 0.70 | V <sub>min</sub> 1.36      | 229.02  |
|                      |       |      | 0.77 | V <sub>average</sub> 5.89  | 331.24  |
|                      |       |      | 0.63 |                            | 271.90  |
|                      |       |      | 0.55 |                            | 195.66  |
|                      |       |      | 0.70 |                            | 211.91  |
|                      |       |      | 0.62 |                            | 137.22  |
|                      |       |      | 0.90 |                            | 186.16  |
|                      |       |      | 0.53 |                            | 136.90  |
|                      |       |      | 0.31 |                            | 119.42  |
|                      |       |      | 0.14 |                            | 89.81   |
|                      |       |      | 0.07 |                            | 59.09   |
|                      |       |      |      |                            | 51.50   |
|                      |       |      |      |                            | 25.00   |
| <b>Cantera R.</b>    | 43.26 | 0.58 | 0.85 | V <sub>max</sub> 8.72      | 415.62  |
|                      |       |      | 0.41 | V <sub>min</sub> 0.96      | 126.22  |
|                      |       |      | 0.41 | V <sub>average</sub> 3.57  | 138.52  |
|                      |       |      | 0.44 |                            | 183.04  |
|                      |       |      | 0.15 |                            | 143.40  |
|                      |       |      | 0.18 |                            | 129.55  |
|                      |       |      | 0.32 |                            | 119.82  |
| <b>Anapo R.</b>      | 54.23 | 0.44 | 0.39 | V <sub>max</sub> 10.72     | 68.01   |
|                      |       |      | 0.49 | V <sub>min</sub> 1.05      | 17.50   |
|                      |       |      | 0.37 | V <sub>average</sub> 3.03  | 215.84  |
|                      |       |      | 0.11 |                            | 467.75  |
|                      |       |      | 0.11 |                            | 1573.24 |
|                      |       |      | 0.47 |                            | 323.82  |
|                      |       |      | 0.53 |                            | 320.53  |
|                      |       |      | 0.57 |                            | 338.97  |
|                      |       |      | 0.31 |                            | 369.90  |
|                      |       |      | 0.27 |                            | 310.00  |
|                      |       |      | 0.46 |                            | 210.98  |
|                      |       |      | 0.39 |                            | 166.67  |
|                      |       |      |      |                            | 140.18  |
|                      |       |      |      |                            | 129.83  |
|                      |       |      |      |                            | 108.27  |
|                      |       |      |      |                            | 79.00   |
|                      |       |      |      |                            | 100.77  |
|                      |       |      |      |                            | 102.50  |
|                      |       |      |      |                            | 81.99   |
|                      |       |      |      |                            | 81.95   |
|                      |       |      |      |                            | 73.46   |
|                      |       |      |      |                            | 25.00   |
